# Supplementary material for: IP6 is an HIV pocket factor that prevents capsid collapse and promotes DNA synthesis
Source: eLife journal article supplement (doi:10.7554/elife.35335), 2018-05-31
Supplement: supp [file elife-35335-supp-v1.zip]

Archive with 2 entries (2 files):
- elife_poa_e35335_Figure_7_figure_supplement_1.eps
- elife_poa_e35335_Transparent_Reporting_File.pdf
